# Supplementary material for: Enhancing thermoelectric performance of Cu2Se by doping Te
Source: Royal Society of Chemistry journal article supplement (doi:10.1039/c7cp05149b), 2017-01-01
Supplement: c7cp05149b1.pdf [file c7cp05149b1.pdf]

# Enhancing the thermoelectric performance of $\text{Cu}_2\text{Se}$ by doping Te

Yong-Bin Zhu<sup>a</sup>, Bo-Ping Zhang<sup>a†</sup>, and Yong Liu<sup>b</sup>

<sup>a</sup> The Beijing Municipal Key Laboratory of New Energy Materials and Technologies, School of Materials Science and Engineering, University of Science and Technology Beijing, Beijing, 100083, China.

<sup>b</sup> AECC Beijing Institute of Aeronautical Materials, Beijing, 100095, China.

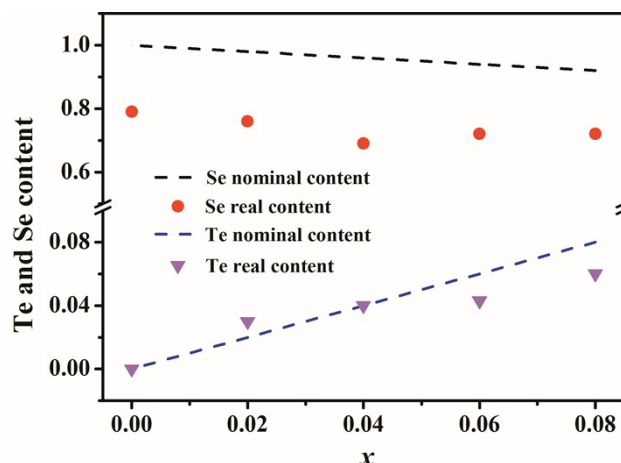

Fig. S1. The Te, Se nominal and real content dependence of the Te doping content  $x$  in the  $\text{Cu}_2\text{Se}_{1-x}\text{Te}_x$  bulk samples.

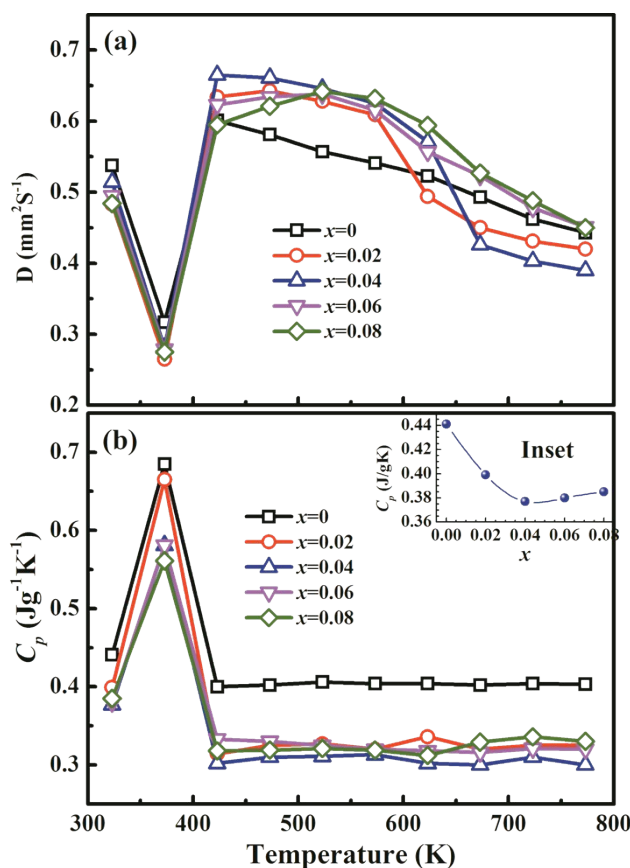

Fig. S2. Temperature dependence of the thermal transport property of  $\text{Cu}_2\text{Se}_{1-x}\text{Te}_x$ . (a) thermal diffusion coefficient ( $D$ ), (b) special heat ( $C_p$ ), the inset show the  $C_p$  dependent on Te-doped content ( $x$ ) at 323 K.

The Lorenz number (Eq. (1)) varies was calculated via using Reduced Fermi energy ( $\eta$ ), which is one-to-one correspondence with Seebeck

coefficient ( $S$ ) value. According to the traditional single parabolic band model,  $\eta$  implicitly determined by the  $S$  (Eq. (2)) was used to estimate the  $L$ .

$$L = \left( \frac{\kappa_B}{e} \right)^2 \left\{ \frac{\left( r + \frac{7}{2} \right) F_{\left( r + \frac{5}{2} \right)}(\eta)}{\left( r + \frac{3}{2} \right) F_{\left( r + \frac{1}{2} \right)}(\eta)} - \left[ \frac{\left( r + \frac{5}{2} \right) F_{\left( r + \frac{3}{2} \right)}(\eta)}{\left( r + \frac{3}{2} \right) F_{\left( r + \frac{1}{2} \right)}(\eta)} \right]^2 \right\} \quad (1)$$

$$S = \frac{\kappa_B}{e} \left[ \frac{\left( r + \frac{5}{2} \right) F_{\left( r + \frac{3}{2} \right)}(\eta)}{\left( r + \frac{3}{2} \right) F_{\left( r + \frac{1}{2} \right)}(\eta)} - \eta \right] \quad (2)$$

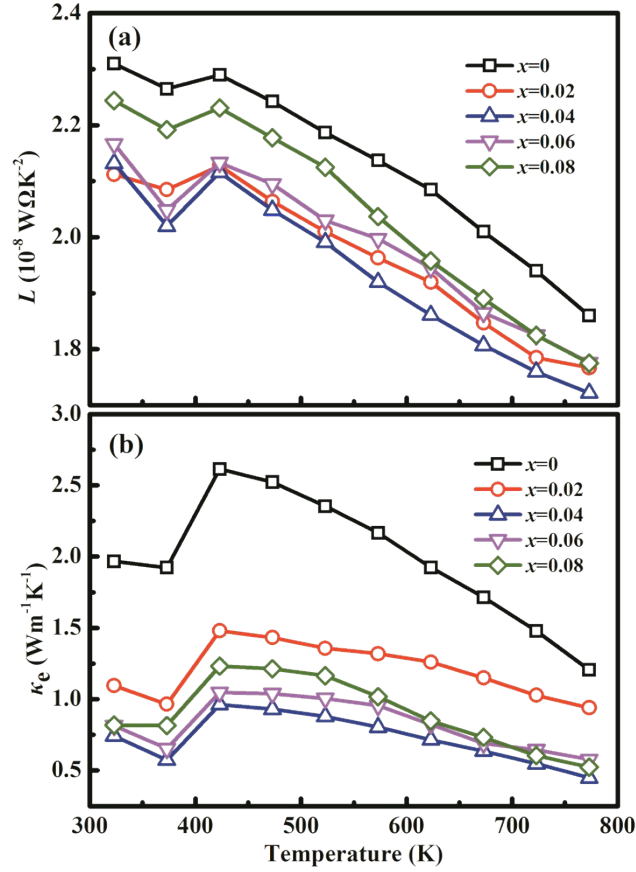

Fig. S3. The calculated Lorenz number ( $L$ ) (a), and carrier thermal conductivity ( $\kappa_e$ ) (b), for  $\text{Cu}_2\text{Se}_{1-x}\text{Te}_x$  samples dependent on the temperature, based on the SPB model.
